# Supplementary material for: Carbohydrate–protein interaction-based detection of pathogenic bacteria using a biodegradable self-powered biosensor
Source: Royal Society of Chemistry journal article supplement (doi:10.1039/d3tb01820b), 2023-01-01
Supplement: d3tb01820b1.pdf [file d3tb01820b1.pdf]

## **Carbohydrate-protein interaction-based detection of pathogenic bacteria using biodegradable self-powered biosensor**

<sup>1</sup>Swati Panda, <sup>1</sup>Sugato Hajra, <sup>1</sup>Hang Gyeom Kim, <sup>2</sup>Haejin Jeong, <sup>3</sup>PGR Acharya, <sup>2</sup>Seonki Hong,  
<sup>4</sup>Bhaskar Dudem, <sup>4</sup>S. Ravi P. Silva, <sup>4,5\*</sup>Vivekananthan Venkateswaran, <sup>1,6\*</sup>Hoe Joon Kim

<sup>1</sup>*Department of Robotics and Mechatronics Engineering, Daegu Gyeongbuk Institute of Science and Technology (DGIST), Daegu-42988, Republic of Korea*

<sup>2</sup>*Department of Physics and Chemistry, Daegu Gyeongbuk Institute of Science and Technology (DGIST), Daegu-42988, Republic of Korea*

<sup>3</sup>*Department of Chemistry, Siksha O Anusandhan University, Bhubaneswar-751030, India*

<sup>4</sup>*Advanced Technology Institute, Department of Electrical and Electronic Engineering, University of Surrey, Guildford, Surrey GU2 7XH, England, United Kingdom.*

<sup>5</sup>*Center for Flexible Electronics, Department of Electronics and Communication Engineering, Koneru Lakshmaiah Education Foundation, Andhra Pradesh-522302, India*

<sup>6</sup>*Robotics and Mechatronics Research Center, Daegu Gyeongbuk Institute of Science and Technology (DGIST), Daegu-42988, South Korea*

### **\*Corresponding Author:**

*Dr. Vivekananthan Venkateswaran ([v.venkateswaran@surrey.ac.uk](mailto:v.venkateswaran@surrey.ac.uk), [vivek@kluniversity.in](mailto:vivek@kluniversity.in))*

*Professor Hoe Joon Kim ([joonkim@dgist.ac.kr](mailto:joonkim@dgist.ac.kr))*

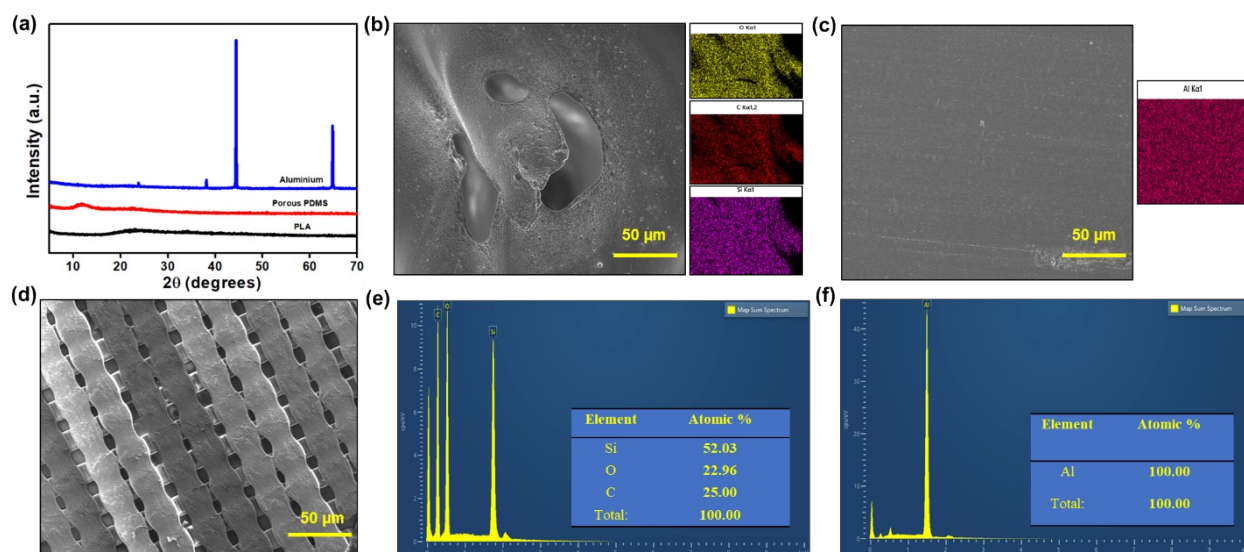

**Figure S1:** (a) room-temperature XRD analysis of PLA, porous PDMS, and aluminum. (b-d) The SEM image and EDS spectra of Si, C, and O in porous PDMS. (e-f) The elemental mapping (at%) of porous PDMS and Al.

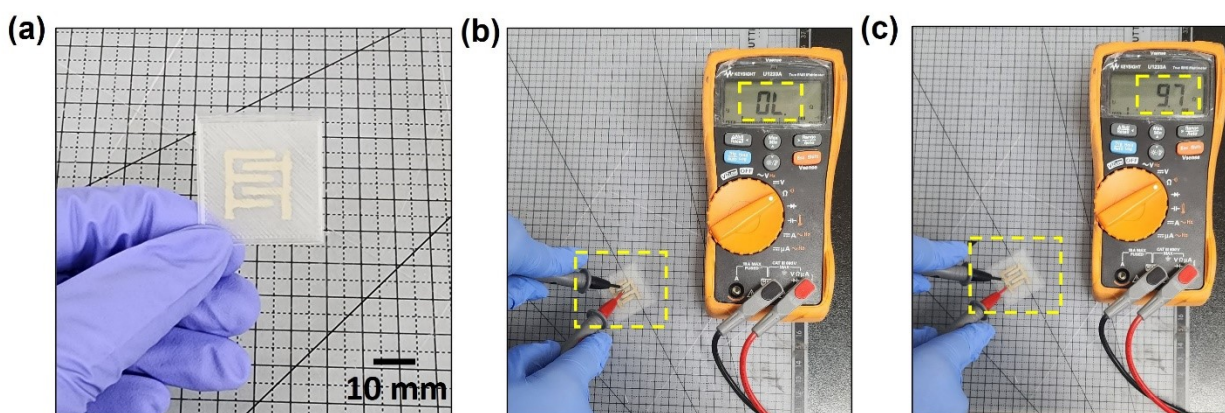

**Figure S2:** (a) The digital image of the biosensor. (b-c) The conductivity of the IDT patterned electrodes.

**Step 3: Application of 3-Mercaptopropionic Acid (3-MPA) Linker**

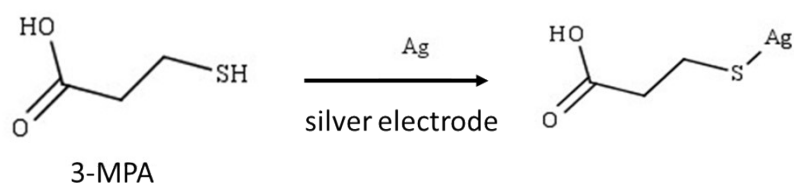

**Step 4: Incubation with D-Mannose**

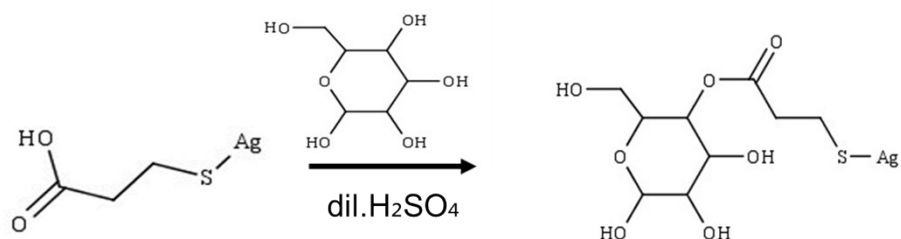

**Figure S3:** (a) Application of 3-Mercaptopropionic Acid (3-MPA) Linker, (b) Incubation with D-Mannose
